## Correction: MicroRNA-29a increased the intestinal membrane permeability of colonic epithelial cells in irritable bowel syndrome rats

Guanqun Chao<sup>1,\*</sup>, Yingying Wang<sup>2,\*</sup>, Shuo Zhang<sup>2,\*</sup>, Weilin Yang<sup>2</sup>, Zheyong Ni<sup>2</sup> and Xuliang Zheng<sup>2</sup>

<sup>1</sup> Department of Family Medicine, Sir Run Run Shaw Hospital, Zhejiang University, China

<sup>2</sup> Department of Gastroenterology, The First Affiliated Hospital, Zhejiang Chinese Medical University, China

\* These authors have contributed equally to this work

**Published:** March 20, 2018

**Copyright:** Chao et al. This is an open-access article distributed under the terms of the Creative Commons Attribution License 3.0 (CC BY 3.0), which permits unrestricted use, distribution, and reproduction in any medium, provided the original author and source are credited.

**This article has been corrected:** The proper name of the institutions are as follows:

<sup>1</sup> Department of Family Medicine, Sir Run Run Shaw Hospital, Zhejiang University, China

<sup>2</sup> Department of Gastroenterology, The First Affiliated Hospital, Zhejiang Chinese Medical University, China

Original article: Oncotarget. 2017; 8:85828-85837. <https://doi.org/10.18632/oncotarget.20687>
